1 **Did knowledge, attitudes, and practices matter during the second**  
2 **wave of COVID-19 pandemic in Bangladesh? Results from a web-**  
3 **based cross-sectional study**

4  
5 Md. Robin Khan<sup>1</sup>, Md. Jamal Hossain<sup>2\*</sup>, Md. Ariful Islam<sup>3</sup>, Shadid Uz Zaman<sup>4</sup>, Mohammad  
6 Touhidul Islam<sup>5</sup>, Md. Anamul Haque<sup>5</sup>, Md. Rabiul Islam<sup>1</sup>, Farhana Alam Ripa<sup>6</sup>, Md. Monirul  
7 Islam<sup>2</sup>, Foyez Ahmmed<sup>7\*</sup>

8  
9 <sup>1</sup>Department of Pharmacy, University of Asia Pacific, 74/A Green Road, Farmgate, Dhaka  
10 1215, Bangladesh

11 <sup>2</sup>Department of Pharmacy, State University of Bangladesh, 77 Satmasjid Road, Dhanmondi,  
12 Dhaka-1205, Bangladesh

13 <sup>3</sup>Bangladesh Reference Institute for Chemical Measurements, Dr. Qudrat-e-Khuda Road  
14 Dhanmondi, Dhaka-1205, Bangladesh

15 <sup>4</sup>Department of Pharmacy, Northern University Bangladesh, 24, Mirpur Road, Globe Center,  
16 Dhaka, 1205, Bangladesh

17 <sup>5</sup>Department of Pharmacy, Daffodil International University, 102/1, Sukrabad, Mirpur Road,  
18 Dhaka-1207, Bangladesh

19 <sup>6</sup>School of Pharmacy, Brac University, 41-Pacific Tower, Mohakhali, Dhaka-1212, Bangladesh

20 <sup>7</sup>Department of Statistics, Comilla University, Kotbari, Cumilla 3506, Bangladesh

21

22

23

24 \* Corresponding authors:

25 Email: [jamal.du.p48@gmail.com](mailto:jamal.du.p48@gmail.com); [jamalhossain@sub.edu.bd](mailto:jamalhossain@sub.edu.bd) (M.J.H.)

26 [foyez.ahmmed@cou.ac.bd](mailto:foyez.ahmmed@cou.ac.bd); [foyez.sbi@gmail.com](mailto:foyez.sbi@gmail.com) (F.A.)

27

28

## 29 **Abstract**

30 Globally, health promotion measures have been undertaken in preventing the emergence and  
31 spread of coronavirus disease 2019 (COVID-19). However, whether these measures influence  
32 public awareness and behaviors is unclear and evidence is limited in particular in low-and-  
33 middle income country. We conducted an online survey among internet users in Bangladesh  
34 to understand the status and attributes of their knowledge, attitudes and practices towards  
35 COVID-19 during second wave of the pandemic when COVID educational information was  
36 more accessible to the public. Survey data were analyzed using descriptive statistics, Chi-  
37 square tests, and multivariate logistic regression analysis. Of 964 respondents, 40.2%, 51.5%,  
38 and 64.3% had good knowledge, confident attitudes, and proper practices towards COVID-  
39 19, respectively. The multivariate regression analysis found that the knowledge and practice  
40 scores were associated ( $p<0.05$ ) with gender, age, and occupation. Females had better  
41 knowledge and practices compared to males ( $p<0.05$ ). There were major gaps in awareness,  
42 attitudes, and practices among internet users in particular males and elders that needs to be  
43 addressed to control the further spread of COVID-19 infections before at least COVID-19  
44 vaccine become accessible at population level in Bangladesh.

45 **Keywords:** COVID-19 outbreak; internet users; Bangladesh; knowledge; attitude; practice

46

47

48

49

50

51

52

53

54

55

56

57

58

59

## 60 **Introduction**

61 On 11<sup>th</sup> March 2020, the World Health Organization (WHO) declared the novel coronavirus  
62 disease (COVID-19), caused by the pathogen severe acute respiratory syndrome coronavirus-  
63 2 (SARS-CoV-2), a global pandemic [1]. This infection emerged as a zoonotic transmission  
64 from Wuhan, China, transmitted from animal to human and recognized as having a high  
65 ability to spread from human to human through direct touch and airway droplets. Symptoms  
66 include high fever, dry cough, breathing difficulties, and a loss of smell. And it may cause  
67 diarrhea, headaches, and body aches [2]. COVID-19 has spread to over 215 countries and  
68 territories around the world with more than 764 million confirmed cases and 6.9 million  
69 deaths [3].

70 Given that the treatment options are limited, public engagement and health education in  
71 outbreak responses have become important in managing outbreak responses [4]. Efforts  
72 include communicating what the disease entails and what symptoms to look out for, and  
73 changing people's transmission-related behaviors to flatten the infection rates.

74 It is so important to emphasize that Bangladesh, being one of the most densely populated  
75 countries, carries a higher risk of spreading COVID-19. The first case of COVID-19 in the  
76 country was officially reported on 08 March 2020 and the first death was reported on 18  
77 March 2020 [5,6]. The government has taken several preventative measures such as  
78 implementing lockdowns, limiting public transportation and endorsing quarantine, and  
79 spreading health awareness messages including maintenance of social distancing using  
80 massmedia [7]. Internet and social media are two important sources for people getting  
81 awareness messages towards preventing COVID-19 [8]. However, both the number of  
82 infected people and the death toll are rising; as of July 27, 2021, Bangladesh has officially  
83 recorded more than 1,179,827 cases and over 19,521 deaths [9].

84 Although several unprecedented strict measures were imposed by the government and  
85 international public health organizations since the inception of the ongoing pandemic, the  
86 success or collapse of these adopted attempts to impede the community transmission is  
87 directly dependent on the general people's knowledge, attitudes, and practices (KAP) towards  
88 the disease. Besides, public behaviors and adherence to the preventive measures authorized  
89 by the authorities significantly influence the inhibition of the infection [10]. Furthermore,  
90 evidence endorses that public' KAP is vital to battling public health emergencies such as  
91 COVID-19, and monkeypox these parameters are undeniably essential tools in identifying  
92 gaps and strengths of undertaken measures [10].

93 Researchers from multiple backgrounds providing exceptional efforts to explore the  
94 knowledge and practices in other regions of the world. For example, studies conducted in  
95 China, Africa, and Italy, identified trends where women, older and those of higher  
96 socioeconomic status were more knowledgeable, optimistic and had adopted appropriate  
97 practices towards COVID-19 [11–13]. While in Saudi Arabia, the prevalence of KAP scores  
98 demonstrated a high level of knowledge, optimistic attitudes, and good level of practice  
99 towards the COVID-19 outbreak, while older adults and women had more knowledge about  
100 the disease [10]. Besides, a systematic review and meta-analysis revealed that the prevalence  
101 of average good knowledge, positive attitudes, and poor practice was 79.4%, 73.7%, and  
102 40.3%, respectively, among the Ethiopian population during the COVID-19 outbreak that  
103 indicated a significant gap in KAP level in respect of WHO guided management and  
104 protective practices [14]. Misbeliefs and misconceptions about the SARS-CoV-2 infection  
105 and treatment persist among a significant percentage of people in Bangladesh [15].  
106 Several studies conducted in Bangladesh have explored public' KAP towards COVID-19  
107 during the early phase with limited knowledge, poor attitudes, and practices tackling  
108 pandemic [16-23]. However, according to the best of our knowledge, very few studies have  
109 been conducted measuring people's KAP towards COVID-19 during the second wave of  
110 COVID-19 in Bangladesh. A study conducted by Islam et al. [24] among the slum dwellers  
111 during the end of the first wave (August-September, 2020) of COVID-19 and reported that  
112 the majority of Bangladeshi slum dwellers had limited knowledge and poor practices (face  
113 mask and hand sanitization).  
114 Maude et al. [25] investigated that a significant improvement in KAP level regarding the  
115 transmission of COVID-19 is possible by targeted promotional activities to address the gaps  
116 and limitations of KAP. By providing accurate information, it is possible to manage such  
117 crises and improve future pandemic preparedness. On the other hand, negative beliefs and  
118 behaviors toward newly infectious diseases can exacerbate epidemics, which may eventually  
119 lead to pandemics. The spread of the illness can be stopped when people work together to  
120 practice preventive behaviors including maintaining personal hygiene and avoiding close  
121 contact. For instance, altering behavior decreased the spread of the virus during the 2009  
122 A/H1N1 influenza pandemic and the Zika outbreak [26]. Information raises citizens'  
123 knowledge levels and promotes positive attitudes, which may aid in the fight against COVID-  
124 19 and other potential threats like monkeypox in the future. Since, SARS-CoV-2 is a novel  
125 virus with a high mutation power, which has resulted in multiple variants and waves of  
126 COVID-19. New variants with new waves won't come as a surprise to us because the world is

127 still fighting the disease with new cases emerging every day. In Bangladesh, where daily  
128 cases of covid 19 is still present, it is imperative to investigate how the public has been  
129 responding to the awareness messages and recommended practices to avoid developing  
130 COVID-19 and prepared themselves to fight with the other infectious disease like  
131 monkeypox. This study explored the knowledge, attitudes, and practices (KAP) of active  
132 internet users in Bangladesh towards COVID-19 during the second wave of the pandemic to  
133 identify relevant gaps and inform health promotion strategies, including target groups to  
134 effectively control COVID-19 in Bangladesh in years ahead.

## 135 **Methods**

### 136 **Study design**

137 A multi-variable, cross-sectional survey has been conducted amongst active internet users in  
138 Bangladesh. “Active” internet users were defined as any individual who had an internet  
139 footprint, i.e. a social media handle or an active email address; these internet accounts were  
140 later used to confirm if the participant was legitimate. The questionnaire was prepared using  
141 Google Forms and the link was shared in the contact lists of the investigators and to  
142 WhatsApp and Facebook groups. The respondents were also encouraged to disseminate  
143 survey link with their peers, a snowball sampling technique [27-29] was utilized to recruit  
144 participants. A resident of Bangladesh with access to the internet, and a willingness to engage  
145 were requirements for inclusion in the study. People who did not actively consent to the  
146 survey and who did not provide their social media account, phone number, or email address  
147 for data verification were omitted. Other exclusion criteria included being under the age of  
148 18. Responses were collected between December 28, 2020 and January 3, 2021.

### 149 **Survey questionnaire**

150 The survey questionnaire consisted of four sections. The first section was the scope of the  
151 study and ethical concerns. The second section collected personal and demographic data. The  
152 third and fourth sections of the questionnaire focused on the knowledge, attitudes, and  
153 practices (KAP) of the respondents regarding COVID-19. The questionnaire used for data  
154 collection was based on the report published by Zhong et al. [11]. A total of thirteen  
155 questions were related to knowledge and five questions covered attitudes and practices.  
156 Among the comprehensive knowledge-based questions, two questions bear general

157 information of the COVID-19 outbreak, three were transmission-related questions, two  
158 questions were symptoms-related, four questions were preventive measures associated  
159 questions, and finally, the rest of the two questions were treatment and physical  
160 complications related. To validate the questionnaire, it was implemented in two steps. Firstly,  
161 we disseminated our initial draft to the team investigators and professional colleagues for  
162 review on the significance and comprehensiveness of the survey. Using the feedback, we  
163 added Bengali (Bangla) translations and made them more simplistic for the general public.  
164 The translation was validated through a forward and backward translation method with the  
165 help of a bilingual expert and who have enough knowledge about medical terminology [29].  
166 Thereafter, 53 persons took part in the questionnaire's pilot testing before a final version was  
167 made in order to evaluate its reliability. Data from the pilot study were imported into IBM  
168 SPSS Version 20 and reliability coefficient analysis was done. According to the pilot data,  
169 the knowledge, attitude, and practice showed respective Cronbach's alpha coefficients of  
170 0.73, 0.68, and 0.71, which shows the internal reliability of the questionnaire. The data from  
171 this pilot study was not used in our final results.

## 172 **Variables and Scoring**

173 Several demographic parameters were used to analyze the knowledge, attitudes, and practices  
174 of the population under study. These parameters included gender, age, marital status,  
175 residence, occupation, and primary social media. The responses for the KAP questions were  
176 scored separately for each variable. The correct answer to a question was scored as “1”, an  
177 incorrect and not sure answer was scored as “0” for knowledge score, whereas the options  
178 were ‘agree’ = ‘1’, ‘disagree’ = ‘0’ and ‘not sure’ = ‘0’ for attitudes-based questions [23, 30].  
179 Besides, the options were ‘yes’ and ‘no’ for the practice-related questions. Using this scoring  
180 methodology, the knowledge score, attitude score, and practice score were determined for the  
181 categories under each variable. The scoring system was adopted based on the available  
182 knowledge uncovered thus far and disseminated by reliable authorities like the World Health  
183 Organization (WHO), the center for disease control (CDC) of the United States, and the  
184 National Health Service (NHS) of England. The knowledge was categorized as “good” or  
185 “poor” based on the score; similarly, the attitude was categorized as “confident” or  
186 “confused,” while practices were categorized as either “proper” or “improper”. Participants  
187 who correctly answered at least 10 questions out of 13 (nearly 80%, according to Bloom’s  
188 cut-off score [23, 31]) were considered to have “Good” knowledge regarding COVID-19,  
189 otherwise considered to have “Poor” knowledge. Besides, participants who showed positive

190 responses to both attitude-related questions were considered to be “Confident”; otherwise,  
191 they were considered to be “Confused”. Furthermore, participants who provided positive  
192 responses to all three practice-related questions were maintaining “Proper” practice;  
193 otherwise, they were considered to maintain “Improper” practice.

## 194 **Statistical Analysis**

195 A chi-square ( $\chi^2$ ) test was performed to evaluate the association between the knowledge,  
196 attitude, and practice with different background characteristics of the study participants.  
197 Multivariate logistic regression analysis was conducted to find the potential socioeconomic  
198 and demographic factors associated with knowledge of COVID-19 and the practice of  
199 sanitation. The reference categories for the regression analysis were indicated by “R”. Results  
200 were illustrated as an adjusted odd ratio (AOR) and 95% confidence interval (CI) with a  
201 significance level ( $p < 0.05$ ) [32]. In addition, *t*-test and one-way analysis-of-variance  
202 (ANOVA) were used to determine any potential differences in mean scores of KAP among  
203 the categories within a variable. All analyses were performed using IBM SPSS Version 20.

## 204 **Participants, ethics, and approval**

205 The Bangladeshi active internet users  $\geq 18$  years of age having social media ID or Email  
206 address, and who clearly understood the questionnaire were eligible to respond to the survey.  
207 In the introduction section of the questionnaire, the participants were clearly introduced to the  
208 study’s aim and objective. Besides, all the respondents were ensured that their provided  
209 information and opinions would have remained confidential and anonymous. Furthermore,  
210 the survey included a consent section where the participants confirmed their virtual consent  
211 and willingness for voluntary participation with no reward and payment. Finally, the  
212 research’s procedure and detailed protocols were critically reviewed and approved by the  
213 ethics committee (Ref. No. DoP/RC/EC/2020/06/app/01OL), the Department of Pharmacy,  
214 the Northern University of Bangladesh under the condition of complete adherence to the  
215 Declaration of Helsinki [33].

216

## 217 **Results**

### 218 **Data**

219 A total of 1396 responses were collected during the study period. Among these responses,  
220 1286 responses were verified to be unquestionably authentic because some respondents failed



221 to answer all questions or provide their social media account, phone number, or e-mail  
222 address. Then, 75% of the data i.e. 964 responses were selected randomly using a  
223 randomization protocol. All analyses described below were performed on these 964  
224 responses.

## 225 **Socioeconomic and Demographic Distribution of the participants**

226 Univariate analysis was performed on the data (N = 964) to understand the socioeconomic  
227 and demographic distribution of the participants. The socioeconomic and demographic  
228 parameters considered were gender, age, region of residence, marital status, occupation, the  
229 effect of COVID-19 on the income status, and the primary source of information on the  
230 Internet. Among the participants, 97.2% were between the ages of 18 and 37 years, 51.56%  
231 were male and 48.44% were female, and most of them were unmarried (86.10%). The  
232 majorities within the other categories consisted of 71.27% residing in the urban parts of  
233 Bangladesh and 76.76% were students. Lastly, the income status did decrease for 77.18% of  
234 the sample size and 79.25% of our respondents use Facebook as their primary social media  
235 account. The summary of the data has been shown in **Table 1**.

236

237 **Table 1: Sociodemographic and KAP distributions of the active internet users during**  
238 **the second wave of COVID-19 outbreak in Bangladesh.**

| Variable              | Number of Participants | Percent (%) of Participants |
|-----------------------|------------------------|-----------------------------|
| <b>Gender</b>         |                        |                             |
| Male                  | 497                    | 51.56                       |
| Female                | 467                    | 48.44                       |
| <b>Age</b>            |                        |                             |
| 18-27 years           | 822                    | 85.27                       |
| 28-37 years           | 115                    | 11.93                       |
| >37 years             | 27                     | 2.80                        |
| <b>Marital status</b> |                        |                             |
| Married               | 830                    | 86.10                       |
| Unmarried             | 134                    | 13.90                       |
| <b>Residence</b>      |                        |                             |
| Urban                 | 687                    | 71.27                       |
| Rural                 | 277                    | 28.73                       |
| <b>Occupation</b>     |                        |                             |
| Student               | 740                    | 76.76                       |
| Unemployed            | 34                     | 3.53                        |



|                                                      |     |       |
|------------------------------------------------------|-----|-------|
| <b>Employed in private sector</b>                    | 126 | 13.07 |
| <b>Employed in public sector/Govt. employee</b>      | 33  | 3.42  |
| <b>Others</b>                                        | 31  | 3.22  |
| <b>Effect of COVID-19 on income status</b>           |     |       |
| <b>Income has increased or remained stable</b>       | 220 | 22.82 |
| <b>Income has decreased</b>                          | 744 | 77.18 |
| <b>Primary source of information on the Internet</b> |     |       |
| <b>Facebook</b>                                      | 764 | 79.25 |
| <b>YouTube</b>                                       | 97  | 10.06 |
| <b>Others</b>                                        | 103 | 10.68 |
| <b>Knowledge level</b>                               |     |       |
| <b>Good</b>                                          | 388 | 40.2  |
| <b>Poor</b>                                          | 576 | 59.8  |
| <b>Attitude towards the pandemic</b>                 |     |       |
| <b>Confident</b>                                     | 496 | 51.5  |
| <b>Confused</b>                                      | 468 | 48.5  |
| <b>Practices in response to the pandemic</b>         |     |       |
| <b>Proper</b>                                        | 620 | 64.3  |
| <b>Improper</b>                                      | 344 | 35.7  |

239

## 240 **Knowledge, attitudes, and practice (KAP)**

241 The goal of this research was to examine the level of knowledge possessed by the participants  
 242 regarding COVID-19, their attitude towards the pandemic, and their practices in response to  
 243 the pandemic. Fig 1 illustrated the distribution of the participants under these categories. From  
 244 the univariate analysis, the prevalence of good knowledge, confident attitudes, and proper  
 245 practice were 40.2% (n = 388), 51.5% (n = 496), and 64.3% (n = 620), respectively among  
 246 the active internet users during the second wave of COVID-19 Bangladesh. In contrast, a  
 247 significant percentage of the participants obtained poor knowledge scores (59.8%) and  
 248 showed confused attitudes (48.5%) and improper practices (35.7%) (Table 1).

249

## 250 **Chi-square ( $\chi^2$ ) analysis**

251 Bivariate analysis, specifically a  $\chi^2$  test of independence, was performed to determine any  
 252 potential association between the socioeconomic or demographic variables and the

253 knowledge, attitude, and practices scores. The findings obtained from this bivariate analysis  
254 were summarized in Table 2.

255 The age group and occupational status were significantly associated with knowledge level  
256 (Table 2). Respondents from 28-37 years age group exhibited the highest percentage in  
257 having good knowledge (51.30%) compared to 18-27 years (38.60%) and those older than 37  
258 years (44.40%) groups. Besides, public job holders dominated in having good knowledge  
259 (60.60%) followed by private (53.20%), unemployed (44.10%), students (37.40%), and  
260 others (29%).

261

**Table 2:** Chi-square ( $\chi^2$ ) test for finding the association of socioeconomic and demographic characteristics of respondents with knowledge, attitude, and practice among the active internet users during the second wave of COVID-19 outbreak in Bangladesh.

| Characteristics           | Categories        | Knowledge |       |      |       | p-value | Attitude |       |           |       | p-value | Practice |       |        |       |         |
|---------------------------|-------------------|-----------|-------|------|-------|---------|----------|-------|-----------|-------|---------|----------|-------|--------|-------|---------|
|                           |                   | Poor      |       | Good |       |         | Confused |       | Confident |       |         | Improper |       | Proper |       |         |
|                           |                   | N         | %     | N    | %     |         | N        | %     | N         | %     |         | N        | %     | N      | %     | p-value |
| <b>Overall</b>            |                   | 576       | 59.8  | 388  | 40.2  |         | 468      | 48.5  | 496       | 51.5  |         | 344      | 35.7  | 620    | 64.3  |         |
| <b>Gender</b>             | Female            | 269       | 57.60 | 198  | 42.40 | 0.187   | 215      | 46.00 | 252       | 54.00 | 0.131   | 117      | 25.10 | 350    | 74.90 | <0.001  |
|                           | Male              | 307       | 61.80 | 190  | 38.20 |         | 253      | 50.90 | 244       | 49.10 |         | 227      | 45.70 | 270    | 54.30 |         |
| <b>Place of residence</b> | Urban             | 410       | 59.70 | 277  | 40.30 | 0.943   | 341      | 49.60 | 346       | 50.40 | 0.287   | 243      | 35.40 | 444    | 64.60 | 0.749   |
|                           | Rural             | 166       | 59.90 | 111  | 40.10 |         | 127      | 45.80 | 150       | 54.20 |         | 101      | 36.50 | 176    | 63.50 |         |
| <b>Age (years)</b>        | 18-27             | 505       | 61.40 | 317  | 38.60 | 0.030   | 389      | 47.30 | 433       | 52.70 | 0.170   | 279      | 33.90 | 543    | 66.10 | 0.021   |
|                           | 28-37             | 56        | 48.70 | 59   | 51.30 |         | 65       | 56.50 | 50        | 43.50 |         | 54       | 47.00 | 61     | 53.00 |         |
|                           | > 37              | 15        | 55.60 | 12   | 44.40 |         | 14       | 51.90 | 13        | 48.10 |         | 11       | 40.70 | 16     | 59.30 |         |
| <b>Marital status</b>     | Unmarried         | 498       | 60.00 | 332  | 40.00 | 0.695   | 394      | 47.50 | 436       | 52.5  | 0.096   | 286      | 34.50 | 544    | 65.50 | 0.048   |
|                           | Married           | 78        | 58.20 | 56   | 41.80 |         | 74       | 55.20 | 60        | 44.80 |         | 58       | 43.30 | 76     | 56.70 |         |
| <b>Occupational group</b> | Student           | 463       | 62.60 | 277  | 37.40 | 0.001   | 346      | 46.80 | 394       | 53.20 | 0.355   | 236      | 31.90 | 504    | 68.10 | <0.001  |
|                           | Unemployed        | 19        | 55.90 | 15   | 44.10 |         | 19       | 55.90 | 15        | 44.10 |         | 14       | 41.20 | 20     | 58.80 |         |
|                           | Private           | 59        | 46.80 | 67   | 53.20 |         | 70       | 55.60 | 56        | 44.40 |         | 61       | 48.40 | 65     | 51.60 |         |
|                           | Public            | 13        | 39.40 | 20   | 60.60 |         | 17       | 51.50 | 16        | 48.50 |         | 19       | 57.60 | 14     | 42.40 |         |
|                           | Others            | 22        | 71.00 | 9    | 29.00 |         | 16       | 51.60 | 15        | 48.40 |         | 14       | 45.20 | 17     | 54.80 |         |
| <b>Change in income</b>   | Stable /increased | 129       | 58.60 | 91   | 41.40 | 0.701   | 118      | 53.60 | 102       | 46.40 | 0.086   | 81       | 36.80 | 139    | 63.20 | 0.689   |
|                           | Decreased         | 447       | 60.10 | 297  | 39.90 |         | 350      | 47.00 | 394       | 53.0  |         | 263      | 35.30 | 481    | 64.70 |         |
| <b>Social media</b>       | Facebook          | 442       | 57.90 | 322  | 42.10 | 0.061   | 373      | 48.80 | 391       | 51.20 | 0.796   | 268      | 35.10 | 496    | 64.90 | 0.610   |

|                  |           |    |       |    |       |  |    |       |    |       |  |     |       |     |       |              |
|------------------|-----------|----|-------|----|-------|--|----|-------|----|-------|--|-----|-------|-----|-------|--------------|
|                  | YouTube   | 66 | 68.00 | 31 | 32.00 |  | 44 | 45.40 | 53 | 54.60 |  | 39  | 40.20 | 58  | 59.80 |              |
|                  | Other     | 68 | 66.0  | 35 | 34.0  |  | 51 | 49.50 | 52 | 50.50 |  | 37  | 35.90 | 66  | 64.10 |              |
| <b>Knowledge</b> | Good      |    |       |    |       |  |    |       |    |       |  | 142 | 36.00 | 246 | 63.40 | 0.632        |
|                  | Poor      |    |       |    |       |  |    |       |    |       |  | 202 | 35.10 | 374 | 64.90 |              |
| <b>Attitudes</b> | Confident |    |       |    |       |  |    |       |    |       |  | 162 | 32.70 | 334 | 67.30 | <b>0.044</b> |
|                  | Confused  |    |       |    |       |  |    |       |    |       |  | 182 | 38.90 | 286 | 61.10 |              |

262

263

264

265

266

267

268

269

270

271

272

273

274

275 In the case of attitude, there was no significant association at 5% confidence interval but  
276 marital status ( $p=0.096$ ) and change in income ( $p=0.086$ ) showed significant association at  
277 10% confidence interval. Positive attitudes were the highest amongst those who were female  
278 (54.0%), lived in rural areas (54.20%), and students (53.20%), as well as those who were  
279 unmarried (52.5%) and between the ages of 18-27 (52.70%).

280 We assessed the practice of public such as avoiding crowded areas, wearing facial masks  
281 when leaving their homes, and practicing proper sanitation methods. In our study, we found  
282 females practiced proper methods (74.90%) compared to males (54.30%), and gender was  
283 found significantly ( $p<0.01$ ) associated with the practice. We also found that age groups,  
284 marital status, and occupational groups were significantly associated ( $p<0.05$ ) with the  
285 practice of sanitation. Respondents aged 18-27 years (66.10%) practiced sanitations more  
286 properly followed by more than 37 (59.30%) and 28-37 (53.00%) age groups. Besides, the  
287 students (68.10%) followed proper practices, followed by the unemployed (58.80%), others  
288 (54.80%), private (51.60%), and the public (42.40%) job holders. Although it was expected  
289 that those who had increasingly good knowledge were going to exhibit proper hygiene  
290 methods, we did not get a significant association between knowledge and practice.  
291 Interestingly, we were able to see a significant association between attitude and practice—  
292 respondents who were confident about the recovery from the pandemic had a higher  
293 percentage of proper practice (67.30%) compared to their opposite counterparts. Similarly, all  
294 the findings from  $\chi^2$  analysis were tabulated in Table 2.

## 295 **Logistic regression analysis**

296 A logistic regression analysis was employed during multivariate analysis to confirm the  
297 potential factors associated with good knowledge and proper practice after adjusting other  
298 factors, and the outcomes obtained from the analysis were tabulated in Table 3. It is noted  
299 here that the trends in attitude were observed to be about half the subcategory demonstrating  
300 positive attitudes towards the effectiveness of Bangladesh's government control of the  
301 coronavirus. We did not consider regression analysis for attitude as we did not get a  
302 significant association for any of the covariates from the chi-square test.

303 **Table 3: Multivariate logistic regression analysis for finding the potential socioeconomic**  
 304 **and demographic factors associated with good knowledge and proper practice among**  
 305 **the populations during the second wave of COVID-19 outbreak in Bangladesh.**

| Characteristics                     | Good knowledge |              |        |       | Proper practice |                   |        |       |
|-------------------------------------|----------------|--------------|--------|-------|-----------------|-------------------|--------|-------|
|                                     | AOR            | p-value      | 95% CI |       | AOR             | p-value           | 95% CI |       |
|                                     |                |              | Lower  | Upper |                 |                   | Lower  | Upper |
| <b>Gender</b>                       |                |              |        |       |                 |                   |        |       |
| <b>Male</b>                         | 0.72           | <b>0.024</b> | 0.55   | 0.95  | 0.41            | <b>&lt; 0.001</b> | 0.31   | 0.55  |
| <b>Female<sup>R</sup></b>           |                |              |        |       |                 |                   |        |       |
| <b>Place of residence</b>           |                |              |        |       |                 |                   |        |       |
| <b>Rural</b>                        | 1.16           | 0.312        | 0.86   | 1.58  | 0.96            | 0.811             | 0.70   | 1.31  |
| <b>Urban<sup>R</sup></b>            |                |              |        |       |                 |                   |        |       |
| <b>Age (years)</b>                  |                |              |        |       |                 |                   |        |       |
| <b>28-37</b>                        | 1.34           | 0.316        | 0.75   | 2.39  | 1.49            | 0.178             | 0.83   | 2.67  |
| <b>more than 37</b>                 | 1.72           | 0.288        | 0.62   | 4.73  | 1.96            | 0.191             | 0.71   | 5.42  |
| <b>18-27<sup>R</sup></b>            |                |              |        |       |                 |                   |        |       |
| <b>Marital status</b>               |                |              |        |       |                 |                   |        |       |
| <b>Married</b>                      | 0.67           | 0.097        | 0.41   | 1.07  | 0.82            | 0.428             | 0.51   | 1.32  |
| <b>Unmarried<sup>R</sup></b>        |                |              |        |       |                 |                   |        |       |
| <b>Occupational group</b>           |                |              |        |       |                 |                   |        |       |
| <b>Unemployed</b>                   | 1.28           | 0.494        | 0.62   | 2.65  | 0.50            | 0.073             | 0.24   | 1.06  |
| <b>Private</b>                      | 2.01           | <b>0.008</b> | 1.20   | 3.38  | 0.47            | <b>0.005</b>      | 0.27   | 0.79  |
| <b>Public</b>                       | 2.74           | <b>0.018</b> | 1.19   | 6.33  | 0.33            | <b>0.010</b>      | 0.14   | 0.76  |
| <b>Others</b>                       | 0.63           | 0.337        | 0.24   | 1.61  | 0.44            | 0.077             | 0.18   | 1.09  |
| <b>Student<sup>R</sup></b>          |                |              |        |       |                 |                   |        |       |
| <b>Change in income</b>             |                |              |        |       |                 |                   |        |       |
| <b>Decreased</b>                    | 1.12           | 0.485        | 0.81   | 1.54  | 1.01            | 0.917             | 0.72   | 1.42  |
| <b>Stable/increased<sup>R</sup></b> |                |              |        |       |                 |                   |        |       |
| <b>Social media</b>                 |                |              |        |       |                 |                   |        |       |
| <b>Youtube</b>                      | 0.69           | 0.125        | 0.44   | 1.10  | 0.78            | 0.304             | 0.50   | 1.23  |
| <b>Other</b>                        | 0.73           | 0.166        | 0.47   | 1.13  | 0.87            | 0.562             | 0.56   | 1.36  |
| <b>Facebook<sup>R</sup></b>         |                |              |        |       |                 |                   |        |       |

|                 |      |              |      |      |      |                   |      |      |
|-----------------|------|--------------|------|------|------|-------------------|------|------|
| <b>Constant</b> | 0.65 | <b>0.013</b> | 0.47 | 0.91 | 3.52 | <b>&lt; 0.001</b> | 2.45 | 5.06 |
|-----------------|------|--------------|------|------|------|-------------------|------|------|

<sup>R</sup>Reference category, AOR and CI stand for adjusted odds ratio and confidence interval, respectively.

306

307 From the multivariate regression analysis, we found that male respondents had 28% of lower  
 308 odds of having good knowledge than the female respondents (adjusted odds ratio [AOR] =  
 309 0.72, 95% CI = 0.55 to 0.95;  $p < 0.024$ ). We also observed that private job holders (AOR=  
 310 2.01,  $p < 0.01$ ) and public job holders (AOR = 2.74,  $p < 0.05$ ) were more likely to have good  
 311 knowledge than the students.

312 In case of practice, the female participants exerted more proper practice compared to the male  
 313 participants in Bangladesh (male vs. female: AOR = 0.41, 95% CI = 0.31 to 0.55;  $p < 0.001$ ).  
 314 Besides, the students exhibited more proper practice than both private (vs. students: AOR =  
 315 0.47, 95% CI = 0.27 to 0.79;  $p = 0.005$ ) and public (vs. students: AOR = 0.33, 95% CI = 0.14  
 316 to 0.76;  $p < 0.01$ ) sector employees. Similarly, all the results extrapolated from the regression  
 317 analysis were summarized in Table 3.

318

### 319 **Measurement of Misconception**

320 The data collected from the participants were also used to make a quantitative assessment of  
 321 misconceptions among the participants. For this purpose, the mean number of wrong answers  
 322 given in the knowledge segment of the questionnaire was determined for each variable.  
 323 Consequently, *t*-test or one-way ANOVA was performed to determine whether any  
 324 statistically significant differences existed between categories within each variable. It was  
 325 observed that male participants provided more wrong answers in the knowledge segment  
 326 compared to female participants ( $p < 0.05$ ). Statistically significant difference in the mean  
 327 number of wrong answers were also observed among various occupational groups with  
 328 participants employed in the public sector providing least number of wrong answers  
 329 compared to other groups such as students, private employees, and the unemployed (**Table**  
 330 **4**).

331 **Table 4: Difference in average number of wrong answers by different background**  
 332 **characteristics of respondents. p-values obtained from independent sample t-test and**  
 333 **one-way ANOVA.**

| Variables | Categories | Wrong answer |
|-----------|------------|--------------|
|-----------|------------|--------------|



|                           |                  | <b>Mean</b> | <b>Standard Deviation</b> | <b>p-value</b> |
|---------------------------|------------------|-------------|---------------------------|----------------|
| <b>Overall</b>            |                  | 1.34        | 1.06, range(0-5)          |                |
| <b>Gender</b>             | Female           | 1.33        | 1.00                      | <b>0.041</b>   |
|                           | Male             | 1.47        | 1.11                      |                |
| <b>Place of resident</b>  | Urban            | 1.39        | 1.07                      | 0.669          |
|                           | Rural            | 1.42        | 1.04                      |                |
| <b>Age (years)</b>        | 18-27            | 1.40        | 1.04                      | 0.958          |
|                           | 28-37            | 1.43        | 1.14                      |                |
|                           | More than 37     | 1.41        | 1.25                      |                |
| <b>Marital status</b>     | Unmarried        | 1.40        | 1.06                      | 0.894          |
|                           | Married          | 1.39        | 1.06                      |                |
| <b>Occupational group</b> | Student          | 1.42        | 1.05                      | <b>0.049</b>   |
|                           | Unemployed       | 1.53        | 1.02                      |                |
|                           | Private          | 1.25        | 1.03                      |                |
|                           | Public           | 1.06        | 1.03                      |                |
|                           | Others           | 1.71        | 1.27                      |                |
| <b>Change in income</b>   | Stable/increased | 1.45        | 1.11                      | 0.463          |
|                           | Decreased        | 1.39        | 1.05                      |                |
| <b>Social media</b>       | Facebook         | 1.39        | 1.05                      | 0.780          |
|                           | YouTube          | 1.41        | 1.08                      |                |
|                           | Other            | 1.47        | 1.14                      |                |

334

## 335 **Discussion**

336 During the second wave of COVID 19, the study aimed to evaluate the knowledge, attitudes,  
337 and practice of Bangladeshi internet users. The results showed a significant number of  
338 sociodemographic characteristics that influence knowledge, attitude, and practice and should  
339 be helpful when developing health education programs regarding newly emerging infectious  
340 diseases. 40.2% of the group polled showed good knowledge, 51.5% showed confident  
341 attitudes, and 64.3% adhere to effective COVID-19 practices. On the other hand, there was  
342 significant correlation between knowledge, practice with gender, age, and occupation  
343 groups. Bangladesh Telecommunication Regulatory Commission does not publish any

344 demographic data on the internet users, and data from other sources regarding this is scarce.  
345 However, Islam et al. [8] have recently reported that around 45 million (27.2%) people out of  
346 168 million are currently using various social media platform in Bangladesh [34]. Notably, in  
347 neighboring country India, 71% of the total internet users were between the age of 16 and 39,  
348 while less than 50% of the users lived in urban areas as of November, 2019 [35]. It is  
349 difficult to make any comparison to the data obtained in this study with that of the data from  
350 India, but it is mentionable that the data obtained in this study is more urban-centric. For 80%  
351 of the participants, Facebook is the primary source of information on the internet. This may  
352 be potentially alarming because a research previously pointed out that misleading information  
353 regarding Zika virus was more popular than useful information on Facebook and had greater  
354 dissemination [36]. Another research of the 492 respondents revealed that social media  
355 (107/492; 21.8%) and television (264/492, 53.7%) are the two main sources of information  
356 for Bangladeshi people regarding the COVID 19 [37]. Social media users of Bangladesh are  
357 not only confined into Facebook they also use YouTube, Twitter, WhatsApp, LinkedIn,  
358 Instagram, Reddit, and Tumblr, among other sites. An online survey that included 265  
359 (N=265) Bangladeshi respondents of various ages from June to October 2020 revealed that  
360 creative social media use improves knowledge of Covid-19 precautions, and that this  
361 important knowledge aids in preventing Covid-19 outbreak in Bangladesh [38].

362 According to the scoring methodology adopted in this study, the enumerated good  
363 knowledge, confident attitudes, and proper practice level among the active internet users were  
364 on par with or higher than the reported by several studies conducted in Bangladesh [16-23].  
365 The good knowledge levels were around 48% and 61%, according to Ferdous et al. [21] and  
366 Banik et al. [23], respectively, for Bangladeshi populations. Besides, the study conducted by  
367 Hossain et al. [17] revealed the level of positive attitudes was 48.25% that might be  
368 equivalent to the current report. In terms of practices, 97.20% followed recommended  
369 hygiene practices like washing hands and avoiding unnecessary touches, while 66.80%  
370 avoided crowded places (data not shown in the Results section). The percentage of wearing  
371 the mask during the early phase COVID-19 in Bangladesh was below 70% [17]. In contrast,  
372 the study found that 98.34% of the participants wore masks when leaving the household,  
373 indicating a clear improvement in proper practices among Bangladesh populations during the  
374 second wave of COVID-19 outbreak. The differences between this study and the other  
375 studies conducted in Bangladesh may be attributed to the fact that the other studies were  
376 conducted during March and April of 2020, when infection had just started spreading in the

377 country and there was less information available on the disease. There are also significant  
378 differences in the questionnaire design and scoring methodology, which may also be a factor.

379 Moreover, the percentage of participants with good knowledge and good practices obtained  
380 in this study are lower than that obtained from a study conducted in Pakistan[39]. A similar  
381 study conducted in India showed that there was a considerable misconception among the  
382 participants; however, the study did not categorize its participants as having good knowledge  
383 or poor knowledge [40]. Studies conducted in other Asian countries like Malaysia, Saudi  
384 Arabia, and Iran reported a higher percentage of participants with good knowledge compared  
385 to this study [10,41,42]. Similar observations can be made regarding the percentage of  
386 participants with good practices. However, due to differences in reporting, a direct  
387 comparison is difficult to make. Furthermore, these studies collected data in the early phase  
388 of COVID-19 pandemic, during February and March. The percentage of participants with  
389 good knowledge in this study is also lower than those obtained from Egypt, Nigeria, Sudan,  
390 and Ethiopia; however, comparatively lower percentage of participants maintained good  
391 practices (e.g. wearing masks) in these studies [12,43–45].The Lower percentage of people  
392 with good practices in these studies compared to the current study may be attributed to  
393 economic conditions in the respective countries among other things.

394 An important aspect of this study was the evaluation of the association between knowledge,  
395 attitude, and practices. Bivariate analysis of data via  $\chi^2$ test revealed that confident attitude  
396 towards COVID-19 was significantly associated with good practices however no statistically  
397 significant association was found between knowledge and practices or knowledge and  
398 attitude. However, Ferdous et al. [21] described a statistically significant association between  
399 attitude and practices, while Paul et al. [16]actually found that many participants with good  
400 knowledge had poor attitudes and practices. Conversely, in the studies conducted in China,  
401 higher knowledge level was found to be associated with positive attitude,[11] though one  
402 study described poor practices and poor attitude in the rural participants compared to urban  
403 participants[46].In Middle Eastern countries like Saudi Arabia, knowledge was found to have  
404 statistically significant association with both practices and attitudes,[10] and among Irani  
405 participants, there was 37% correlation between knowledge and practice [42]. Studies  
406 conducted in Egypt and Nigeria showed that knowledge was significantly associated with  
407 attitude/perception,[12, 44] while study on the Sudanese population showed that higher  
408 knowledge had statistically significant association with both positive attitude and good  
409 practices [43].

410 Multivariate analysis also found that male participants are statistically less knowledgeable  
411 than females. In addition, it was also observed that males provided significantly more wrong  
412 answers than females in this study. A similar result was found in the study by Wadoodet  
413 al.[47]. In contrast, Ferdous et al. [21] and Paul et al. [16] found no statistically significant  
414 gender difference in knowledge while Hossainet al. [19] 2020 actually found that males were  
415 more knowledgeable than females. Outside Bangladesh, studies conducted by Al-Hanawiet al.  
416 [10] (Saudi Arabia), Abdelhafizet al. [48] (Egypt), Aynalemet al. [49] (Ethiopia,  
417 students) found no statistically significant gender difference in knowledge level. Besides,  
418 Azlanet al. [41] (Malaysia), Hager et al. [12] (Nigeria and Egypt), Hezimaet al. [43] (Sudan),  
419 Honarvaret al. [42] (Iran), and so on, reported that either the knowledge level of the female  
420 respondents was higher than males or unsatisfactory knowledge level was more pronounced  
421 in males than in females. Only Hayat et al. [39] 2020 reported males having higher  
422 knowledge level compared to female respondents in Pakistan. Consequently, it has appeared  
423 that not only in Bangladesh, but also in many other parts of the world, females were more  
424 knowledgeable about COVID-19 than males.

425 Paradoxically, the private and public/government employees exerted two times and 2.74  
426 times more likely to be knowledgeable, respectively, than the students in Bangladesh. Despite  
427 having much and higher knowledge levels, these two categories of professionals (private and  
428 public/government employees) significantly failed to perform proper practice during the  
429 second wave of the COVID-19 outbreak in Bangladesh. Similarly, Ferdous et al. [21]  
430 demonstrated that the government employees exhibited more accurate knowledge than the  
431 students (51.6% vs. 49%); in contrast, private job holders showed less accurate knowledge  
432 than the students (47.6% vs. 49%). In another study, Banik et al. [23] found that students  
433 showed better practice scores than the govt./private job holder (mean  $\pm$  standard deviation =  
434  $2.52 \pm 0.36$  vs.  $2.47 \pm 0.35$ ;  $p < 0.05$ ). Besides, the student category of participants showed  
435 around more than two times better practice towards the anti-COVID-19 measures in  
436 Bangladesh compared to the businessman (OR = 2.35, 95% CI = 1.01 to 5.67). As the  
437 working people/job holders have to go to their offices and outside of the home, they have  
438 been more concerned and given instructions and cautionary regarding the COVID-19 from  
439 their institutions. On the other hand, students might have a greater opportunity to access the  
440 information, but they might be less concerned about COVID-19 by spending time buzzing  
441 with friends and others.

442 Overall, this study seems to corroborate well with other studies conducted in many parts of  
443 the world regarding the knowledge, attitude, and practices related to COVID-19. However, it

444 reports that the percentage of Bangladeshi internet users with good knowledge about COVID-  
445 19 is lower than the percentage of people in other parts of the world. However, in terms of  
446 practices, the results are on par with other countries. The main strength of the study is that it  
447 was conducted at a comparatively mature stage of the pandemic as opposed to the initial  
448 stage; therefore, it represents the status of the public when more knowledge has been  
449 uncovered and some awareness programs have been conducted. So, this study strongly  
450 indicates that policies and awareness programs should focus on enhancing the knowledge  
451 about COVID-19 among Bangladeshi internet users, particularly the male users.

## 452 **Practical implementations**

453 Several anti-epidemic measures such as lockdown, social distancing, isolation, quarantine,  
454 and so on are being imposed by national and international authorities to tackle the rapid  
455 transmission of SARS-CoV-2 infection. However, the understanding and profound  
456 comprehension of the information, severity, and adopted measures are the preconditions for  
457 implementing these public health measures. Besides, before assuring the mass vaccination, all  
458 the health-related practices against COVID-19 should be established among the common  
459 people as a prime concern. The present study revealed a need for more comprehensive  
460 educational programs that emphasize uniformity in information from the government and  
461 other authorities. A proactive approach to COVID-19 education should be taken, focusing on  
462 eliminating misconceptions such as competing viewpoints, myths, and inaccurate  
463 information. The results of our study will help public health experts, epidemiologists, and  
464 especially those who work on health communication and making an effort to understand the  
465 COVID-19 knowledge, attitudes, and practices among the general people to develop cost-  
466 effective public health campaigns and education initiatives. The findings obtained in this  
467 study might also help the health experts and policy makers develop the most successful public  
468 health strategy and policy against COVID-19 in the community level of developing countries,  
469 including Bangladesh.

## 470 **Limitations**

471 This cross-sectional study is not flawless while having some drawbacks which need to be  
472 noted. Firstly, the survey was a self-reported web-based study which had no casual  
473 inferences. Secondly, the collection of data was not random, rather followed a snowball  
474 technique, and therefore this data may not be fully representative of the total population of

475 active internet users in Bangladesh. Thirdly, the sample size is moderate, and higher samples  
476 would have provided further strength to the study.

## 477 **Conclusion**

478 The proper level of KAP among the general population is mandatorily required for tackling  
479 COVID-19 and implementing countrywide anti-COVID-19 measures. The current research's  
480 exact aim was to assess the KAP score among the active and regular internet users during the  
481 second wave of the COVID-19 outbreak in Bangladesh. As seen by the current data and  
482 evidence, there are significant gaps in awareness, attitudes, and practices among the  
483 Bangladeshi population, particularly the males and elders. In addition, the overall percentage  
484 of COVID-19 knowledge amongst Bangladeshi internet users is comparatively low compared  
485 to other parts of the world. Hence, it is imperative that public health officials take into  
486 account these gaps of understanding and try to educate the public as a method in mitigating  
487 the effects of the COVID-19 pandemic.

488

## 489 **Acknowledgments**

490 Authors are grateful to the study participants, and the volunteers who supported piloting the  
491 surveytool.

## 492 **References**

- 493 [1] N. Chen, M. Zhou, X. Dong, J. Qu, F. Gong, Y. Han, Y. Qiu, J. Wang, Y. Liu, Y. Wei,  
494 J. Xia, T. Yu, X. Zhang, L. Zhang, Epidemiological and clinical characteristics of 99  
495 cases of 2019 novel coronavirus pneumonia in Wuhan, China: a descriptive study, *The*  
496 *Lancet*. 395 (2020) 507–513. [https://doi.org/10.1016/S0140-6736\(20\)30211-7](https://doi.org/10.1016/S0140-6736(20)30211-7).
- 497 [2] Hossain MJ, Kuddus MR, Rashid MA, Sultan MZ. Understanding and dealing the  
498 SARS-CoV-2 infection: an updated concise review. *Bangladesh Pharm J*. 2021;24:61-  
499 75.
- 500 [3] Weekly epidemiological update. <https://covid19.who.int> (accessed April 26, 2023).
- 501 [4] Hossain MJ, Rahman SMA. Repurposing therapeutic agents against SARS-CoV-2  
502 infection: most promising and neoteric progress. *Expert Rev Anti Infect Ther*. 2020 Dec  
503 23:1-19. doi: 10.1080/14787210.2021.1864327.



- 504 [5] Islam MT, Talukder AK, Siddiqui MN, Islam T. Tackling the COVID-19 pandemic: The  
505 Bangladesh perspective, *J Public Health Res.* 9 (2020).  
506 <https://doi.org/10.4081/jphr.2020.1794>.
- 507 [6] Hossain MJ. Social Organizations and Mass Media in COVID-19 Battle: A Bidirectional  
508 Approach in Bangladesh. *Asia Pac J Public Health.* 2021 May;33(4):467-468. doi:  
509 10.1177/10105395211002601.
- 510 [7] Coronavirus outbreak: Govt orders closure of public, private offices from March 26 to  
511 April 4 | *The Daily Star*, (n.d.). [https://www.thedailystar.net/coronavirus-deadly-new-](https://www.thedailystar.net/coronavirus-deadly-new-threat/news/govt-offices-closed-march-26-april-4-cabinet-secretary-1884730)  
512 [threat/news/govt-offices-closed-march-26-april-4-cabinet-secretary-1884730](https://www.thedailystar.net/coronavirus-deadly-new-threat/news/govt-offices-closed-march-26-april-4-cabinet-secretary-1884730) (accessed  
513 October 31, 2020).
- 514 [8] Islam MR, Jannath S, Moona AA, Akter S, Hossain MJ, Islam SMA. Association  
515 between the use of social networking sites and mental health of young generation in  
516 Bangladesh: A cross-sectional study. *J Community Psychol.* 2021 Jul 21. doi:  
517 10.1002/jcop.22675.
- 518 [9] World Health Organization (WHO). Accessed July 27, 2021. Available from:  
519 [Bangladesh: WHO Coronavirus Disease \(COVID-19\) Dashboard With Vaccination](#)  
520 [Data | WHO Coronavirus \(COVID-19\) Dashboard With Vaccination Data](#)
- 521 [10] M.K. Al-Hanawi, K. Angawi, N. Alshareef, A.M.N. Qattan, H.Z. Helmy, Y.  
522 Abudawood, M. Alqurashi, W.M. Kattan, N.A. Kadasah, G.C. Chirwa, O. Alsharqi,  
523 Knowledge, Attitude and Practice Toward COVID-19 Among the Public in the  
524 Kingdom of Saudi Arabia: A Cross-Sectional Study. *Frontiers in Public Health.* 8  
525 (2020). <https://doi.org/10.3389/fpubh.2020.00217>.
- 526 [11] Zhong BL, Luo W, Li HM, Zhang QQ, Liu XG, Li WT, Li Y. Knowledge, attitudes,  
527 and practices towards COVID-19 among Chinese residents during the rapid rise period  
528 of the COVID-19 outbreak: a quick online cross-sectional survey. *Int J Biol Sci.* 2020  
529 Mar 15;16(10):1745-1752. doi: 10.7150/ijbs.45221.
- 530 [12] E. Hager, I.A. Odetokun, O. Bolarinwa, A. Zainab, O. Okechukwu, A.I. Al-Mustapha,  
531 Knowledge, attitude, and perceptions towards the 2019 Coronavirus Pandemic: A bi-  
532 national survey in Africa, *PLOS ONE.* 15 (2020) e0236918.  
533 <https://doi.org/10.1371/journal.pone.0236918>.
- 534 [13] D. Souli, M. Dilucca, Knowledge, attitude and practice of secondary school students  
535 toward COVID-19 epidemic in Italy: a cross selectional study, *BioRxiv.* (2020)  
536 2020.05.08.084236. <https://doi.org/10.1101/2020.05.08.084236>.



- 537 [14] Lake EA, Demissie BW, Gebeyehu NA, Wassie AY, Gelaw KA, Azeze GA.  
538 Knowledge, attitude and practice towards COVID-19 among health professionals in  
539 Ethiopia: A systematic review and meta-analysis. *PLoS One*. 2021 Feb  
540 19;16(2):e0247204. doi: 10.1371/journal.pone.0247204.
- 541 [15] Mistry SK, Ali AM, Yadav UN *et al.* COVID-19 related misconceptions among older  
542 adults in Bangladesh: findings from a cross-sectional study [version 1; peer review: 1  
543 not approved]. *F1000Research* 2021, 10:216doi:  
544 <https://doi.org/10.12688/f1000research.51597.1>
- 545 [16] Paul A, Sikdar D, Hossain MM, Amin MR, Deebea F, Mahanta J, Javed MA, Islam MM,  
546 Noon SJ, Nath TK. Knowledge, attitudes, and practices toward the novel coronavirus  
547 among Bangladeshis: Implications for mitigation measures. *PLoS One*. 2020 Sep  
548 2;15(9):e0238492. doi: 10.1371/journal.pone.0238492.
- 549 [17] Hossain MJ, Kuddus MR, Rahman SMA. Knowledge, Attitudes, and Behavioral  
550 Responses Toward COVID-19 During Early Phase in Bangladesh: A Questionnaire-  
551 Based Study. *Asia Pac J Public Health*. 2021 Jan;33(1):141-144. doi:  
552 10.1177/1010539520977328.
- 553 [18] Rahman, Shahrul, A. Akter, KF Mostari, S. Ferdousi, IJ Ummon, SM Naafi, Mm  
554 Rahman, M. Uddin, S. Tasmin, S. Lopa, SM Sayadat Amin, M. Miah, TK Saha, M. A.  
555 Rahim and S. Hossain. "Assessment of knowledge, attitudes and practices towards  
556 prevention of coronavirus disease (COVID-19) among Bangladeshi  
557 population." *Bangladesh Medical Research Council Bulletin* 46 (2020): 73-82.
- 558 [19] Hossain MA, Jahid MIK, Hossain KMA, Walton LM, Uddin Z, Haque MO, Kabir MF,  
559 Arafat SMY, Sakel M, Faruqui R, Hossain Z. Knowledge, attitudes, and fear of  
560 COVID-19 during the Rapid Rise Period in Bangladesh. *PLoS One*. 2020 Sep  
561 24;15(9):e0239646. doi: 10.1371/journal.pone.0239646.
- 562 [20] Rahman, A. and N. J. Sathi. "Knowledge, attitude, and preventive practices toward  
563 COVID-19 among Bangladeshi internet users." (2020).
- 564 [21] Ferdous MZ, Islam MS, Sikder MT, Mosaddek ASM, Zegarra-Valdivia JA, Gozal D.  
565 Knowledge, attitude, and practice regarding COVID-19 outbreak in Bangladesh: An  
566 online-based cross-sectional study. *PLoS One*. 2020 Oct 9;15(10):e0239254. doi:  
567 10.1371/journal.pone.0239254.
- 568 [22] Hossain MB, Alam MZ, Islam MS, Sultan S, Faysal MM, Rima S, Hossain MA,  
569 Mahmood MM, Kashfi SS, Mamun AA, Monia HT, Shoma SS. Do knowledge and  
570 attitudes matter for preventive behavioral practices toward the COVID-19? A cross-

- 571 sectional online survey among the adult population in Bangladesh. *Heliyon*. 2020  
572 Dec;6(12):e05799. doi: 10.1016/j.heliyon.2020.e05799.
- 573 [23] Banik R, Rahman M, Sikder MT, Rahman QM, Pranta MUR. Knowledge, attitudes, and  
574 practices related to the COVID-19 pandemic among Bangladeshi youth: a web-based  
575 cross-sectional analysis. *Z Gesundh Wiss*. 2021 Jan 16;1-11. doi: 10.1007/s10389-020-  
576 01432-7.
- 577 [24] Islam S, Emran GI, Rahman E, Banik R, Sikder T, Smith L, Hossain S. Knowledge,  
578 attitudes and practices associated with the COVID-19 among slum dwellers resided in  
579 Dhaka City: a Bangladeshi interview-based survey. *J Public Health (Oxf)*. 2021 Apr  
580 12;43(1):13-25. doi: 10.1093/pubmed/fdaa182.
- 581 [25] Maude RR, Jongdeepaisal M, Skuntaniyom S, Muntajit T, Blacksell SD, Khuenpetch  
582 W, Pan-Ngum W, Taleangkaphan K, Malathum K, Maude RJ. Improving knowledge,  
583 attitudes and practice to prevent COVID-19 transmission in healthcare workers and the  
584 public in Thailand. *BMC Public Health*. 2021 Apr 18;21(1):749. doi: 10.1186/s12889-  
585 021-10768-y.
- 586 [26] Hasan, Md Zahid, AM Rumayan Hasan, Md Golam Rabbani, Mohammad Abdus Selim,  
587 and Shehrin Shaila Mahmood. "Knowledge, attitude, and practice of Bangladeshi urban  
588 slum dwellers towards COVID-19 transmission-prevention: A cross-sectional  
589 study." *PLOS Global Public Health* 2, no. 9 (2022): e0001017.
- 590 [27] R.C. Reuben, M.M.A. Danladi, D.A. Saleh, P.E. Ejembi, Knowledge, Attitudes and  
591 Practices Towards COVID-19: An Epidemiological Survey in North-Central Nigeria, *J*  
592 *Community Health*. (2020) 1–14. <https://doi.org/10.1007/s10900-020-00881-1>.
- 593 [28] L.A. Goodman, Snowball Sampling, *Ann. Math. Statist.* 32 (1961) 148–170.  
594 <https://doi.org/10.1214/aoms/1177705148>.
- 595 [29] Hossain, M. J., Ahmmed, F., Rahman, S. M. A., Sanam, S., Emran, T. B., Mitra, S.  
596 Impact of online education on fear of academic delay and psychological distress among  
597 university students following one year of the COVID-19 outbreak in Bangladesh.  
598 *Heliyon* 2021. doi: <https://doi.org/10.1016/j.heliyon.2021.e07388>.
- 599 [30] Andrade C, Menon V, Ameen S, Kumar Praharaj S. Designing and Conducting  
600 Knowledge, Attitude, and Practice Surveys in Psychiatry: Practical Guidance. *Indian J*  
601 *Psychol Med*. 2020 Aug 27;42(5):478-481. doi: 10.1177/0253717620946111.
- 602 [31] Kaliyaperumal, K. Guideline for conducting a knowledge, attitude and practice (KAP)  
603 study. *Community Ophthalmology* 2004; 4: 7–9

- 604 [32] Hossain MJ, Hridoy A, Rahman SMA, Ahmmmed F. Major Depressive and Generalized  
605 Anxiety Disorders Among University Students During the Second Wave of COVID-19  
606 Outbreak in Bangladesh. *Asia Pac J Public Health*. 2021 May 10;10105395211014345.  
607 doi: 10.1177/10105395211014345. Epub ahead of print. PMID: 33969713.
- 608 [33] World Medical Association Declaration of Helsinki. Ethical principles for medical  
609 research involving human subjects., *Bull World Health Organ*. 79 (2001) 373–374.
- 610 [34] Hossain MJ. Is Bangladesh moving toward herd immunity? Current COVID-19  
611 perspective. *Bangladesh J Infect Dis*. 2020;7(suppl\_2): S63-S66.
- 612 [35] For the first time, India has more rural net users than urban - The Times Of India -  
613 Bangalore, 5/6/2020, (n.d).  
614 [https://epaper.timesgroup.com/Olive/ODN/TimesOfIndia/shared/ShowArticle.aspx?doc](https://epaper.timesgroup.com/Olive/ODN/TimesOfIndia/shared/ShowArticle.aspx?doc=TOIBG%2F2020%2F05%2F06&entity=Ar00110&sk=0E13F922&mode=text#)  
615 [=TOIBG%2F2020%2F05%2F06&entity=Ar00110&sk=0E13F922&mode=text#](https://epaper.timesgroup.com/Olive/ODN/TimesOfIndia/shared/ShowArticle.aspx?doc=TOIBG%2F2020%2F05%2F06&entity=Ar00110&sk=0E13F922&mode=text#)  
616 (accessed October 31, 2020).
- 617 [36] Sharma M, Yadav K, Yadav N, Ferdinand KC. Zika virus pandemic-analysis of  
618 Facebook as a social media health information platform. *Am J Infect Control*. 2017 Mar  
619 1;45(3):301-302. doi: 10.1016/j.ajic.2016.08.022.
- 620 [37] Rabbani, Md Golam, Orin Akter, Md Zahid Hasan, Nandeeta Samad, Shehrin Shaila  
621 Mahmood, and Taufique Joarder. "COVID-19 Knowledge, Attitudes, and Practices  
622 Among People in Bangladesh: Telephone-Based Cross-sectional Survey." *JMIR*  
623 *Formative Research* 5, no. 11 (2021): e28344.
- 624 [38] Islam, Md, Faroque Ahmed, and Afrin Sadia Rumana. "Creative social media use for  
625 Covid-19 prevention in Bangladesh: a structural equation modeling approach." *Social*  
626 *Network Analysis and Mining* 11, no. 1 (2021): 1-14.
- 627 [39] Hayat K, Rosenthal M, Xu S, Arshed M, Li P, Zhai P, Desalegn GK, Fang Y. View of  
628 Pakistani Residents toward Coronavirus Disease (COVID-19) during a Rapid Outbreak:  
629 A Rapid Online Survey. *Int J Environ Res Public Health*. 2020 May 12;17(10):3347.  
630 doi: 10.3390/ijerph17103347.
- 631 [40] Roy D, Tripathy S, Kar SK, Sharma N, Verma SK, Kaushal V. Study of knowledge,  
632 attitude, anxiety & perceived mental healthcare need in Indian population during  
633 COVID-19 pandemic. *Asian J Psychiatr*. 2020 Jun;51:102083. doi:  
634 10.1016/j.ajp.2020.102083.
- 635 [41] Azlan AA, Hamzah MR, Sern TJ, Ayub SH, Mohamad E. Public knowledge, attitudes  
636 and practices towards COVID-19: A cross-sectional study in Malaysia. *PLoS One*. 2020  
637 May 21;15(5):e0233668. doi: 10.1371/journal.pone.0233668.

- 638 [42] Honarvar B, Lankarani KB, Kharmandar A, Shaygani F, Zahedroozgar M, Rahmanian  
639 Haghighi MR, Ghahramani S, Honarvar H, Daryabadi MM, Salavati Z, Hashemi SM,  
640 Joulaei H, Zare M. Knowledge, attitudes, risk perceptions, and practices of adults  
641 toward COVID-19: a population and field-based study from Iran. *Int J Public Health*.  
642 2020 Jul;65(6):731-739. doi: 10.1007/s00038-020-01406-2.
- 643 [43] Hezima A, Aljafari A, Aljafari A, Mohammad A, Adel I. Knowledge, attitudes, and  
644 practices of Sudanese residents towards COVID-19. *East Mediterr Health J*. 2020 Jun  
645 24;26(6):646-651. doi: 10.26719/emhj.20.076.
- 646 [44] Ck E, Ai W, Va K. Knowledge, Attitude and Practice of Clients towards COVID-19 at  
647 Primary Healthcare Facilities in Rivers State, Nigeria, (2020).  
648 <https://doi.org/10.21203/rs.3.rs-40966/v1>.
- 649 [45] Asmelash D, Fasil A, Tegegne Y, Akalu TY, Ferede HA, Aynalem GL. Knowledge,  
650 Attitudes and Practices Toward Prevention and Early Detection of COVID-19 and  
651 Associated Factors Among Religious Clerics and Traditional Healers in Gondar Town,  
652 Northwest Ethiopia: A Community-Based Study. *Risk Manag Healthc Policy*. 2020 Oct  
653 20;13:2239-2250. doi: 10.2147/RMHP.S277846.
- 654 [46] Chen X, Chen H. Differences in Preventive Behaviors of COVID-19 between Urban  
655 and Rural Residents: Lessons Learned from A Cross-Sectional Study in China. *Int J*  
656 *Environ Res Public Health*. 2020 Jun 20;17(12):4437. doi: 10.3390/ijerph17124437.
- 657 [47] Wadood MA, Mamun ASMA, Rafi MA, Islam MK, Mohd S, Lee LL, Hossain MG.  
658 Knowledge, attitude, practice and perception regarding COVID-19 among students in  
659 Bangladesh: Survey in Rajshahi University. *medRxiv*. 2020.  
660 doi: <https://doi.org/10.1101/2020.04.21.20074757>
- 661 [48] Abdelhafiz AS, Mohammed Z, Ibrahim ME, Ziady HH, Alorabi M, Ayyad M, Sultan  
662 EA. Knowledge, Perceptions, and Attitude of Egyptians Towards the Novel  
663 Coronavirus Disease (COVID-19). *J Community Health*. 2020 Oct;45(5):881-890. doi:  
664 10.1007/s10900-020-00827-7.
- 665 [49] Aynalem YA, Akalu TY, Gebresellassie B, Sharew NT, Shiferaw WS. Assessment of  
666 undergraduate student knowledge, practices, and attitude towards COVID-19 in Debre  
667 Berhan University, Ethiopia. *Research Square* 2020. DOI: 10.21203/rs.3.rs-28556/v1.

668

669

670

671

672

673

674

675

676

677

678

679 Legends

680 **Fig 1. Percentage distributions of good and poor knowledge, confident and confused**  
681 **attitudes, and proper and improper practice among the internet users during the second**  
682 **wave of COVID-19 outbreak in Bangladesh.**

683

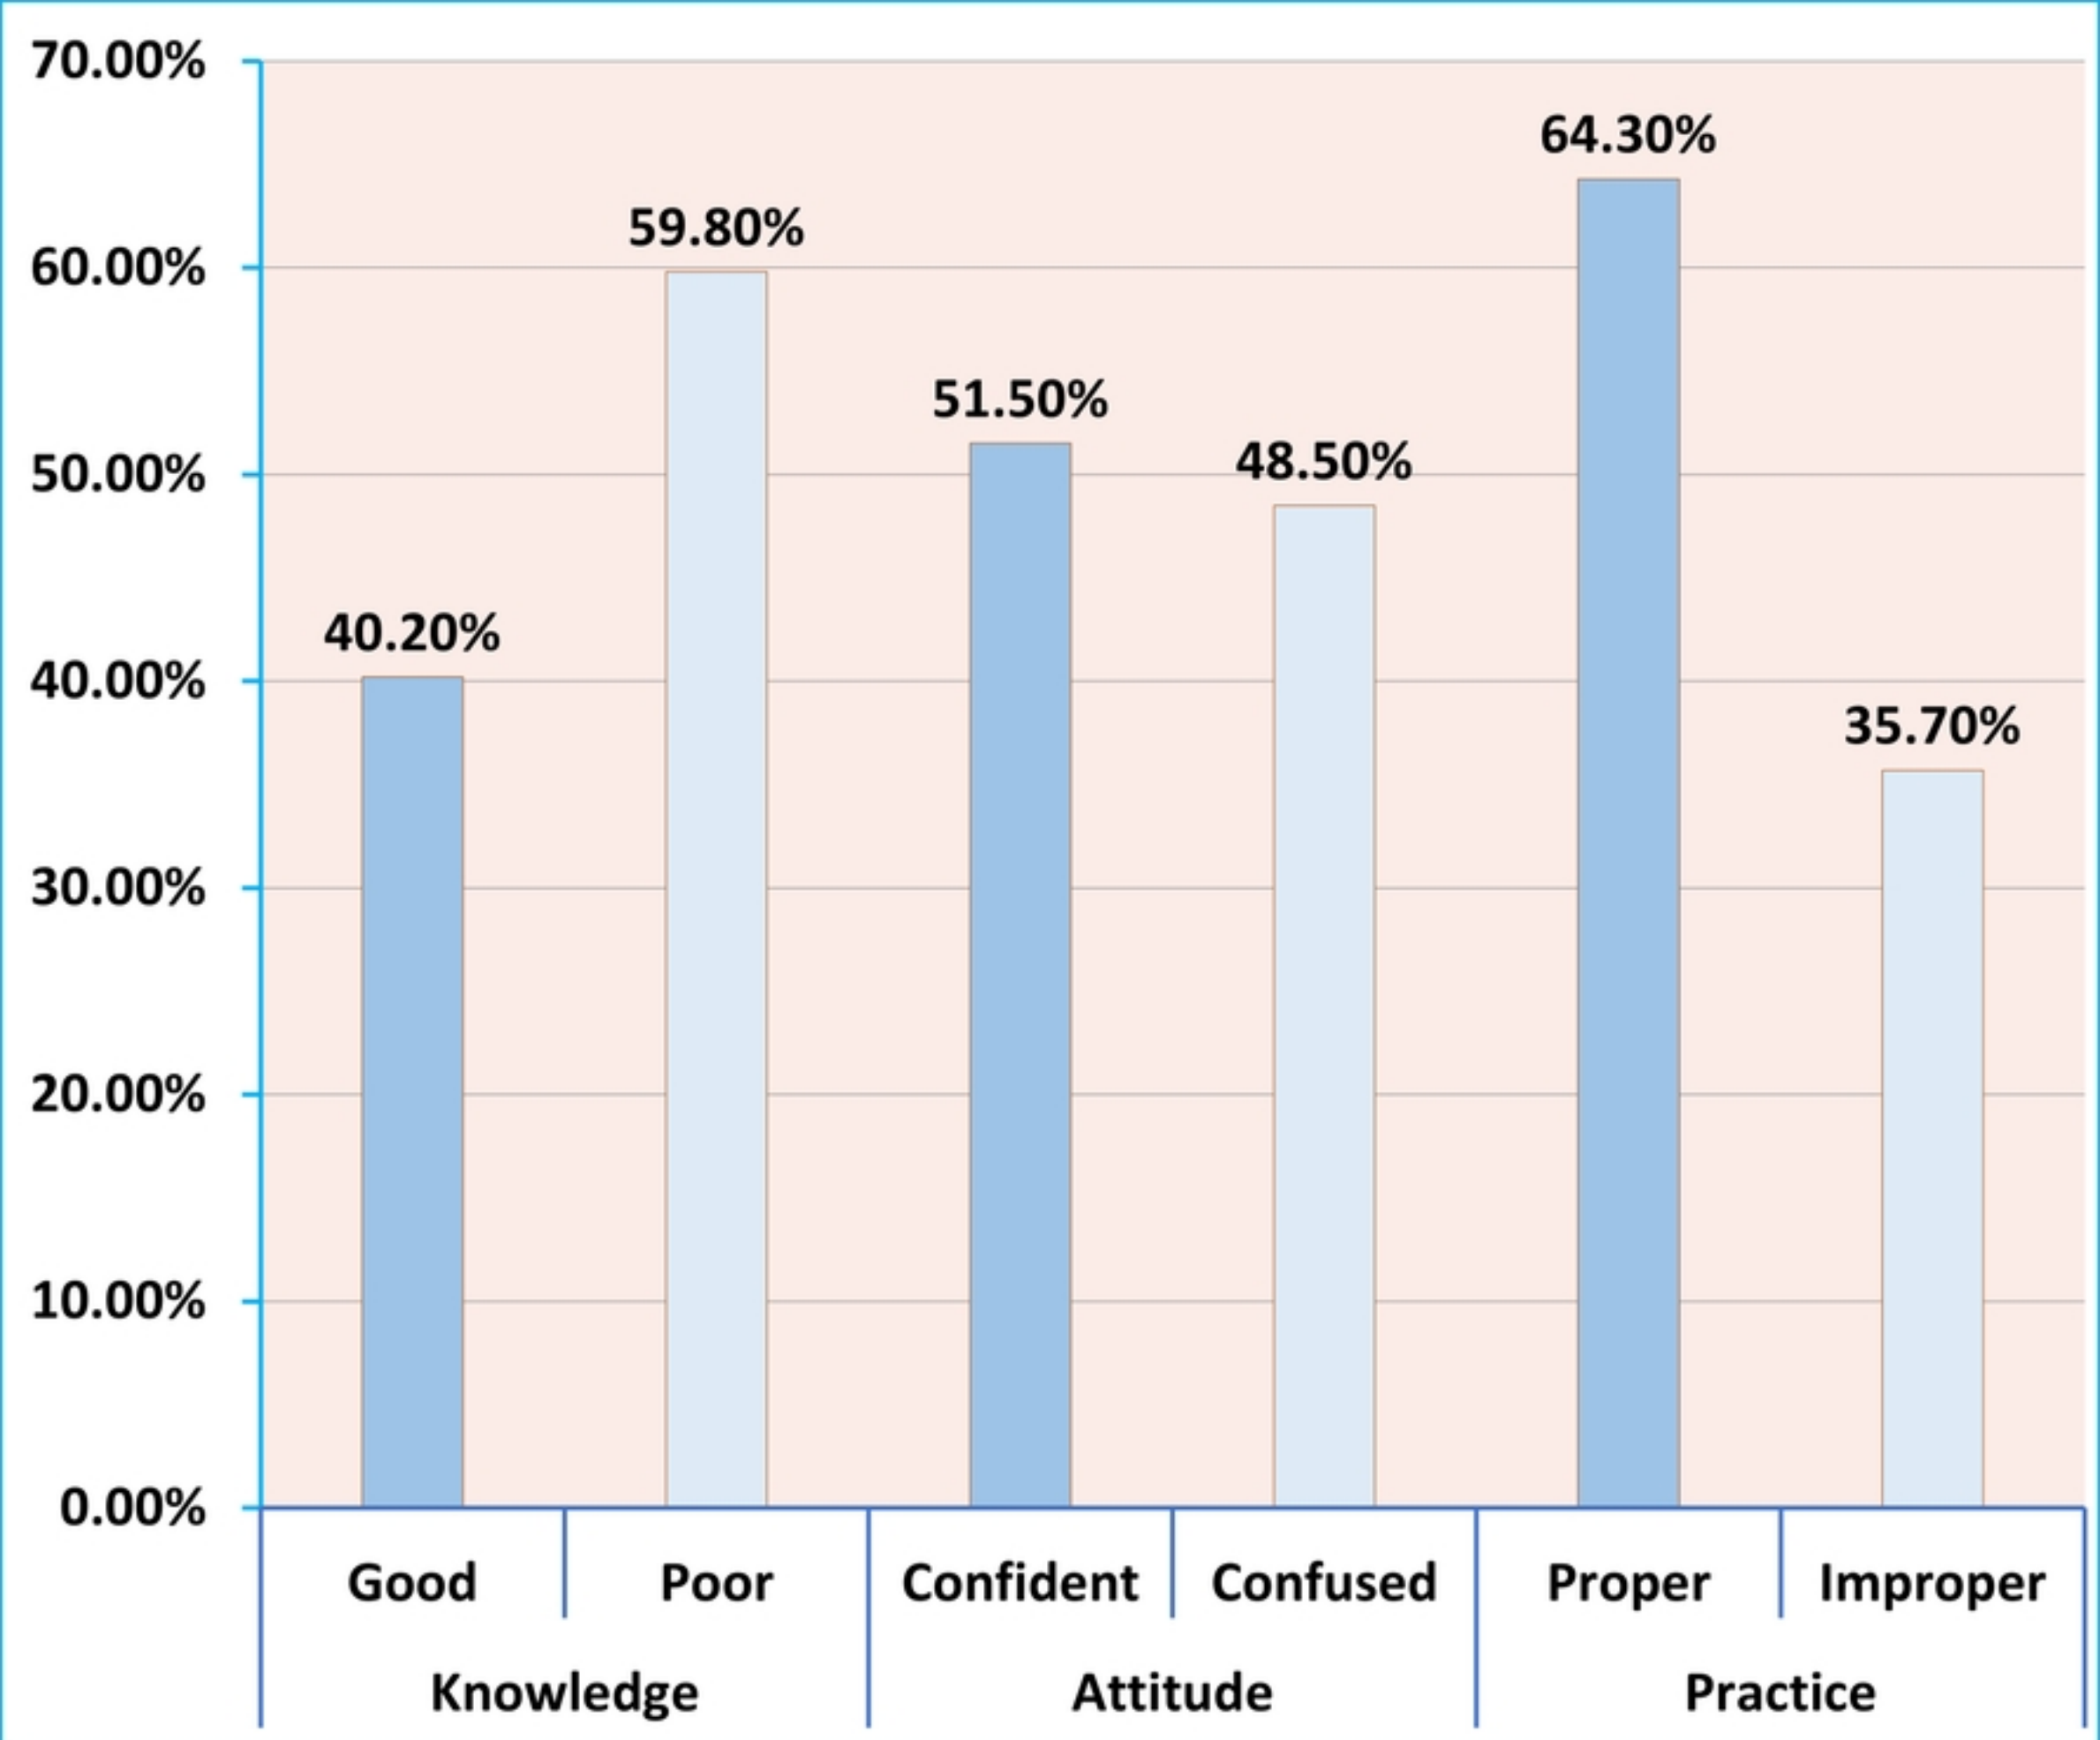

Figure
